# Supplementary material for: Prevalence and Clinical Impact of Heterogeneous Vancomycin-Intermediate Staphylococcus aureus Isolated From Hospitalized Patients
Source: PubMed Central journal article supplement — Ann Lab Med. 2016 Feb 23;36(3):235–43. doi: 10.3343/alm.2016.36.3.235 (PMC4773264; doi:10.3343/alm.2016.36.3.235), 2016-02-23
Supplement: alm-36-235-s001.pdf [file alm-36-235-s001.pdf]

**Supplemental Data Table S1.** Univariate analysis of predictors for treatment failure in MRSA-SAB patients

| Characteristics                                             | Treatment failure (+)<br>(N=21) (%) | Treatment failure (-)<br>(N=25) (%) | P  |
|-------------------------------------------------------------|-------------------------------------|-------------------------------------|----|
| Age (mean ± SD, yr)                                         | 60.1 ± 13.0                         | 65.6 ± 13.7                         | NS |
| Old age (≥ 65 yr)                                           | 9 (42.9)                            | 15 (60.0)                           | NS |
| Male                                                        | 13 (61.9)                           | 9 (36.0)                            | NS |
| Vancomycin MIC ≥ 1.5 µg/mL                                  | 11 (52.4)                           | 11 (44.0)                           | NS |
| Teicoplanin MIC ≥ 4 µg/mL                                   | 11 (52.4)                           | 11 (44.0)                           | NS |
| hVISA* (+)                                                  | 11 (52.4)                           | 11 (44.0)                           | NS |
| Duration of hospital stay before SAB onset (mean ± SD, day) | 23.1 ± 32.8                         | 11.6 ± 18.3                         | NS |
| <b>Mode of transmission</b>                                 |                                     |                                     |    |
| Hospital-acquired                                           | 7 (33.3)                            | 6 (24.0)                            | NS |
| <b>Primary source of infection</b>                          |                                     |                                     |    |
| Infective endocarditis                                      | 1 (4.8)                             | 1 (4.0)                             | NS |
| Intravascular catheter-related                              | 1 (4.8)                             | 1 (4.0)                             | NS |
| Osteomyelitis                                               | 1 (4.8)                             | 0 (-)                               | NS |
| Pneumonia                                                   | 2 (9.5)                             | 0 (-)                               | NS |
| Skin and soft tissue                                        | 2 (9.5)                             | 1 (4.0)                             | NS |
| Surgical wound                                              | 0 (-)                               | 1 (4.0)                             | NS |
| Unknown (primary bacteremia)                                | 14 (66.7)                           | 21 (84.0)                           | NS |
| <b>Comorbidity</b>                                          |                                     |                                     |    |
| Solid cancer                                                | 2 (9.5)                             | 6 (24.0)                            | NS |
| Hematologic malignancy                                      | 3 (14.3)                            | 2 (8.0)                             | NS |
| Diabetes mellitus                                           | 5 (23.8)                            | 6 (24.0)                            | NS |
| Cerebrovascular accident                                    | 6 (28.6)                            | 3 (12.0)                            | NS |
| Congestive heart failure                                    | 3 (14.3)                            | 3 (12.0)                            | NS |
| Chronic liver disease                                       | 2 (9.5)                             | 3 (12.0)                            | NS |
| Chronic respiratory disease                                 | 5 (23.8)                            | 4 (16.0)                            | NS |
| Chronic kidney disease                                      | 4 (19.0)                            | 5 (20.0)                            | NS |
| <b>Previous treatment</b>                                   |                                     |                                     |    |
| Previous surgery                                            | 9 (42.9)                            | 10 (40.0)                           | NS |
| Cancer chemotherapy                                         | 4 (19.0)                            | 5 (20.0)                            | NS |
| Immunosuppressive therapy                                   | 1 (4.8)                             | 2 (8.0)                             | NS |
| Prior vancomycin therapy                                    | 11 (52.4)                           | 9 (36.0)                            | NS |
| Appropriate empirical therapy                               | 13 (61.9)                           | 11 (44.0)                           | NS |

Categorical variables were compared using Fisher's exact test, and continuous variables were compared using t-test.

\*The hVISA phenotype was identified by macromethod E test.

Abbreviations: MRSA, methicillin-resistant *S. aureus*; hVISA, heterogeneous vancomycin-intermediate *S. aureus*; SAB, *S. aureus* bacteremia; MIC, minimum inhibitory concentration; NS, not significant.
