# Supplementary material for: Prevalence and Clinical Impact of Heterogeneous Vancomycin-Intermediate Staphylococcus aureus Isolated From Hospitalized Patients
Source: PubMed Central journal article supplement — Ann Lab Med. 2016 Feb 23;36(3):235–43. doi: 10.3343/alm.2016.36.3.235 (PMC4773264; doi:10.3343/alm.2016.36.3.235), 2016-02-23
Supplement: alm-36-235-s002.pdf [file alm-36-235-s002.pdf]

**Supplemental Data Table S2.** Univariate analysis of predictors for 30-day mortality in MRSA-SAB patients

| Characteristics                                             | 30-day mortality (+)<br>(N= 15) (%) | 30-day mortality (-)<br>(N= 39) (%) | P      |
|-------------------------------------------------------------|-------------------------------------|-------------------------------------|--------|
| Age (mean ± SD, yr)                                         | 65.4 ± 11.4                         | 64.6 ± 14.9                         | NS     |
| Old age (≥ 65 yr)                                           | 8 (53.3)                            | 22 (56.4)                           | NS     |
| Male                                                        | 5 (33.3)                            | 18 (46.2)                           | NS     |
| Vancomycin MIC ≥ 1.5 µg/mL                                  | 10 (66.7)                           | 17 (43.6)                           | NS     |
| Teicoplanin MIC ≥ 4 µg/mL                                   | 9 (60.0)                            | 17 (43.6)                           | NS     |
| hVISA* (+)                                                  | 9 (60.0)                            | 17 (43.6)                           | NS     |
| Duration of hospital stay before SAB onset (mean ± SD, day) | 30.2 ± 40.2                         | 8.6 ± 11.4                          | 0.0032 |
| <b>Mode of transmission</b>                                 |                                     |                                     |        |
| Hospital-acquired                                           | 9 (60.0)                            | 7 (17.9)                            | 0.0059 |
| <b>Primary source of infection</b>                          |                                     |                                     |        |
| Infective endocarditis                                      | 2 (13.3)                            | 0 (-)                               | NS     |
| Intravascular catheter-related                              | 1 (6.7)                             | 2 (5.1)                             | NS     |
| Osteomyelitis                                               | 0 (-)                               | 1 (2.6)                             | NS     |
| Pneumonia                                                   | 0 (-)                               | 4 (10.3)                            | NS     |
| Skin and soft tissue                                        | 1 (6.7)                             | 2 (5.1)                             | NS     |
| Surgical wound                                              | 0 (-)                               | 1 (2.6)                             | NS     |
| Unknown (primary bacteremia)                                | 11 (73.3)                           | 29 (74.4)                           | NS     |
| <b>Comorbidity</b>                                          |                                     |                                     |        |
| Solid cancer                                                | 4 (26.7)                            | 5 (12.8)                            | NS     |
| Hematologic malignancy                                      | 1 (6.7)                             | 4 (10.3)                            | NS     |
| Diabetes melitus                                            | 5 (33.3)                            | 8 (20.5)                            | NS     |
| Cerebrovascular accident                                    | 3 (20.0)                            | 9 (23.1)                            | NS     |
| Congestive heart failure                                    | 6 (40.0)                            | 3 (7.7)                             | 0.0095 |
| Chronic liver disease                                       | 3 (20.0)                            | 5 (12.8)                            | NS     |
| Chronic respiratory disease                                 | 2 (13.3)                            | 10 (25.6)                           | NS     |
| Chronic kidney disease                                      | 4 (26.7)                            | 6 (15.4)                            | NS     |
| <b>Previous treatment</b>                                   |                                     |                                     |        |
| Previous surgery                                            | 9 (60.0)                            | 13 (33.3)                           | NS     |
| Cancer chemotherapy                                         | 5 (33.3)                            | 5 (12.8)                            | NS     |
| Immunosuppressive therapy                                   | 2 (13.3)                            | 2 (5.1)                             | NS     |
| Prior vancomycin therapy                                    | 10 (66.7)                           | 13 (33.3)                           | 0.0349 |
| Appropriate empirical therapy                               | 8 (53.3)                            | 15 (38.5)                           | NS     |

Categorical variables were compared using Fisher's exact test, and continuous variables were compared using Mann-Whitney U test.

\*The hVISA phenotype was identified by macromethod E test.

Abbreviations: MRSA, methicillin-resistant *S. aureus*; hVISA, heterogeneous vancomycin-intermediate *S. aureus*; SAB, *S. aureus* bacteremia; MIC, minimum inhibitory concentration; NS, not significant.
