# Supplementary material for: Prevalence and Clinical Impact of Heterogeneous Vancomycin-Intermediate Staphylococcus aureus Isolated From Hospitalized Patients
Source: PubMed Central journal article supplement — Ann Lab Med. 2016 Feb 23;36(3):235–43. doi: 10.3343/alm.2016.36.3.235 (PMC4773264; doi:10.3343/alm.2016.36.3.235), 2016-02-23
Supplement: alm-36-235-s003.pdf [file alm-36-235-s003.pdf]

**Supplemental Data Table S3.** Univariate analysis of predictors for treatment failure in MRSA-SAP patients

| Characteristics                                             | Treatment failure (+)<br>(N=9) (%) | Treatment failure (-)<br>(N=18) (%) | P      |
|-------------------------------------------------------------|------------------------------------|-------------------------------------|--------|
| Age (mean ± SD, yr)                                         | 71.9 ± 8.4                         | 67.1 ± 18.0                         | NS     |
| Old age (≥ 65 yr)                                           | 7 (77.8)                           | 12 (66.7)                           | NS     |
| Male                                                        | 6 (66.7)                           | 12 (66.7)                           | NS     |
| Vancomycin MIC ≥ 1.5 µg/mL                                  | 8 (88.9)                           | 9 (50.0)                            | NS     |
| Teicoplanin MIC ≥ 4 µg/mL                                   | 8 (88.9)                           | 5 (27.8)                            | 0.0044 |
| hVISA* (+)                                                  | 9 (100.0)                          | 8 (44.4)                            | 0.0088 |
| Duration of hospital stay before SAP onset (mean ± SD, day) | 11.6 ± 14.2                        | 11.4 ± 17.1                         | NS     |
| Mode of transmission                                        |                                    |                                     |        |
| Hospital-acquired                                           | 4 (44.4)                           | 4 (22.2)                            | NS     |
| Comorbidity                                                 |                                    |                                     |        |
| Solid cancer                                                | 1 (11.1)                           | 1 (5.6)                             | NS     |
| Hematologic malignancy                                      | 1 (11.1)                           | 1 (5.6)                             | NS     |
| Diabetes mellitus                                           | 2 (22.2)                           | 5 (27.8)                            | NS     |
| Cerebrovascular accident                                    | 2 (22.2)                           | 6 (33.3)                            | NS     |
| Congestive heart failure                                    | 1 (11.1)                           | 2 (11.1)                            | NS     |
| Chronic liver disease                                       | 0 (-)                              | 1 (5.6)                             | NS     |
| Chronic respiratory disease                                 | 3 (33.3)                           | 3 (16.7)                            | NS     |
| Chronic kidney disease                                      | 2 (22.2)                           | 5 (27.8)                            | NS     |
| Previous treatment                                          |                                    |                                     |        |
| Previous surgery                                            | 3 (33.3)                           | 4 (22.2)                            | NS     |
| Cancer chemotherapy                                         | 2 (22.2)                           | 0 (-)                               | NS     |
| Immunosuppressive therapy                                   | 1 (11.1)                           | 0 (-)                               | NS     |
| Prior vancomycin therapy                                    | 3 (33.3)                           | 5 (27.8)                            | NS     |
| Appropriate empirical therapy                               | 5 (55.5)                           | 10 (55.6)                           | NS     |

Categorical variables were compared using Fisher's exact test, and continuous variables were compared using Mann-Whitney U test.

\*The hVISA phenotype was identified by macromethod E test.

Abbreviations: MRSA, methicillin-resistant *S. aureus*; hVISA, heterogeneous vancomycin-intermediate *S. aureus*; MIC, minimum inhibitory concentration; NS, not significant.
