# Supplementary material for: Prevalence and Clinical Impact of Heterogeneous Vancomycin-Intermediate Staphylococcus aureus Isolated From Hospitalized Patients
Source: PubMed Central journal article supplement — Ann Lab Med. 2016 Feb 23;36(3):235–43. doi: 10.3343/alm.2016.36.3.235 (PMC4773264; doi:10.3343/alm.2016.36.3.235), 2016-02-23
Supplement: alm-36-235-s004.pdf [file alm-36-235-s004.pdf]

**Supplemental Data Table S4.** Univariate analysis of predictors for treatment failure in MSSA-SAB patients

| Characteristics                                             | Treatment failure (+)<br>(N= 13) (%) | Treatment failure (-)<br>(N= 33) (%) | P      |
|-------------------------------------------------------------|--------------------------------------|--------------------------------------|--------|
| Age (mean ± SD, yr)                                         | 65.4 ± 10.8                          | 65.1 ± 13.5                          | NS     |
| Old age (≥ 65 yr)                                           | 6 (46.2)                             | 21 (63.6)                            | NS     |
| Male                                                        | 10 (76.9)                            | 23 (69.7)                            | NS     |
| Vancomycin MIC ≥ 1.5 µg/mL                                  | 6 (46.2)                             | 12 (36.4)                            | NS     |
| Teicoplanin MIC ≥ 4 µg/mL                                   | 2 (15.4)                             | 1 (3.0)                              | NS     |
| hVISA* (+)                                                  | 3 (23.1)                             | 1 (3.0)                              | NS     |
| Duration of hospital stay before SAB onset (mean ± SD, day) | 1.8 ± 3.3                            | 4.6 ± 9.0                            | NS     |
| Mode of transmission                                        |                                      |                                      |        |
| Hospital-acquired                                           | 3 (23.1)                             | 8 (24.2)                             | NS     |
| Primary source of infection                                 |                                      |                                      |        |
| Infective endocarditis                                      | 1 (7.7)                              | 2 (6.1)                              | NS     |
| Intravascular catheter-related                              | 0 (-)                                | 0 (-)                                | -      |
| Osteomyelitis                                               | 0 (-)                                | 3 (9.1)                              | NS     |
| Pneumonia                                                   | 1 (7.7)                              | 3 (9.1)                              | NS     |
| Skin and soft tissue                                        | 1 (7.7)                              | 3 (9.1)                              | NS     |
| Surgical wound                                              | 1 (7.7)                              | 1 (3.0)                              | NS     |
| Unknown (primary bacteremia)                                | 9 (69.2)                             | 21 (63.6)                            | NS     |
| Comorbidity                                                 |                                      |                                      |        |
| Solid cancer                                                | 3 (23.1)                             | 8 (24.2)                             | NS     |
| Hematologic malignancy                                      | 1 (7.7)                              | 2 (6.1)                              | NS     |
| Diabetes mellitus                                           | 4 (30.8)                             | 6 (18.2)                             | NS     |
| Cerebrovascular accident                                    | 3 (23.1)                             | 9 (27.3)                             | NS     |
| Congestive heart failure                                    | 4 (30.8)                             | 4 (12.1)                             | NS     |
| Chronic liver disease                                       | 1 (7.7)                              | 9 (27.3)                             | NS     |
| Chronic respiratory disease                                 | 4 (30.8)                             | 6 (18.2)                             | NS     |
| Chronic kidney disease                                      | 2 (15.4)                             | 2 (6.1)                              | NS     |
| Previous treatment                                          |                                      |                                      |        |
| Previous surgery                                            | 8 (61.5)                             | 3 (9.1)                              | 0.0006 |
| Cancer chemotherapy                                         | 2 (15.4)                             | 6 (18.2)                             | NS     |
| Immunosuppressive therapy                                   | 1 (7.7)                              | 2 (6.1)                              | NS     |
| Prior vancomycin therapy                                    | 6 (46.2)                             | 5 (15.2)                             | NS     |
| Appropriate empirical therapy                               | 12 (92.3)                            | 31 (93.9)                            | NS     |

Categorical variables were compared using Fisher's exact test, and continuous variables were compared using Mann-Whitney U test.

\*The hVISA phenotype was identified by macromethod E test.

Abbreviations: MRSA, methicillin-resistant *S. aureus*; hVISA, heterogeneous vancomycin-intermediate *S. aureus*; SAB, *S. aureus* bacteremia; MIC, minimum inhibitory concentration; NS, not significant.
