# Supplementary material for: Prevalence and Clinical Impact of Heterogeneous Vancomycin-Intermediate Staphylococcus aureus Isolated From Hospitalized Patients
Source: PubMed Central journal article supplement — Ann Lab Med. 2016 Feb 23;36(3):235–43. doi: 10.3343/alm.2016.36.3.235 (PMC4773264; doi:10.3343/alm.2016.36.3.235), 2016-02-23
Supplement: alm-36-235-s005.pdf [file alm-36-235-s005.pdf]

**Supplemental Data Table S5.** Univariate analysis of predictors for 30-day mortality in MSSA-SAB patients

| Characteristics                                             | 30-day mortality (+)<br>(N=12) (%) | 30-day mortality (-)<br>(N=41) (%) | P      |
|-------------------------------------------------------------|------------------------------------|------------------------------------|--------|
| Age (mean ± SD, yr)                                         | 66.3 ± 13.2                        | 64.7 ± 12.2                        | NS     |
| Old age (≥65 yr)                                            | 8 (66.7)                           | 21 (51.2)                          | NS     |
| Male                                                        | 8 (66.7)                           | 27 (65.9)                          | NS     |
| Vancomycin MIC ≥ 1.5 µg/mL                                  | 4 (33.3)                           | 16 (39.0)                          | NS     |
| Teicoplanin MIC ≥ 4 µg/mL                                   | 0 (-)                              | 3 (7.3)                            | NS     |
| hVISA* (+)                                                  | 0 (-)                              | 4 (9.8)                            | NS     |
| Duration of hospital stay before SAB onset (mean ± SD, day) | 10.8 ± 26.5                        | 4.2 ± 8.3                          | NS     |
| <b>Mode of transmission</b>                                 |                                    |                                    |        |
| Hospital-acquired                                           | 5 (41.7)                           | 7 (17.1)                           | NS     |
| <b>Primary source of infection</b>                          |                                    |                                    |        |
| Infective endocarditis                                      | 2 (16.7)                           | 1 (2.4)                            | NS     |
| Intravascular catheter-related                              | 0 (-)                              | 0 (-)                              | -      |
| Osteomyelitis                                               | 1 (8.3)                            | 2 (4.9)                            | NS     |
| Pneumonia                                                   | 2 (16.7)                           | 2 (4.9)                            | NS     |
| Skin and soft tissue                                        | 0 (-)                              | 5 (12.2)                           | NS     |
| Surgical wound                                              | 0 (-)                              | 2 (4.9)                            | NS     |
| Unknown (primary bacteremia)                                | 7 (58.3)                           | 29 (70.7)                          | NS     |
| <b>Comorbidity</b>                                          |                                    |                                    |        |
| Solid cancer                                                | 6 (50.0)                           | 7 (17.1)                           | NS     |
| Hematologic malignancy                                      | 0 (-)                              | 3 (7.3)                            | NS     |
| Diabetes melitus                                            | 0 (-)                              | 12 (29.3)                          | 0.0476 |
| Cerebrovascular accident                                    | 3 (25.0)                           | 9 (22.0)                           | NS     |
| Congestive heart failure                                    | 2 (16.7)                           | 6 (14.6)                           | NS     |
| Chronic liver disease                                       | 4 (33.3)                           | 6 (14.6)                           | NS     |
| Chronic respiratory disease                                 | 2 (16.7)                           | 9 (22.0)                           | NS     |
| Chronic kidney disease                                      | 0 (-)                              | 6 (14.6)                           | NS     |
| <b>Previous treatment</b>                                   |                                    |                                    |        |
| Previous surgery                                            | 4 (33.3)                           | 8 (19.5)                           | NS     |
| Cancer chemotherapy                                         | 4 (33.3)                           | 5 (12.2)                           | NS     |
| Immunosuppressive therapy                                   | 0 (-)                              | 3 (7.3)                            | NS     |
| Prior vancomycin therapy                                    | 6 (50.0)                           | 7 (17.1)                           | NS     |
| Appropriate empirical therapy                               | 11 (91.7)                          | 38 (92.7)                          | NS     |

Categorical variables were compared using Fisher's exact test, and continuous variables were compared using Mann-Whitney U test.

\*The hVISA phenotype was identified by macromethod E test.

Abbreviations: MRSA, methicillin-resistant *S. aureus*; hVISA, heterogeneous vancomycin-intermediate *S. aureus*; SAB, *S. aureus* bacteremia; NS, not significant.
